# Supplementary material for: Evaluation of the X-chromosome inactivation patterns in females with Gabriele-de Vries syndrome and expansion of clinical spectrum
Source: Research Square preprint supplement (doi:10.21203/rs.3.rs-8846661/v1), 2026-02-22
Supplement: Supplementary file 1 [file 0e91111041de4de7a96734d8.pdf]

**Article title:** Evaluation of the X-chromosome inactivation patterns in females with Gabriele-de Vries syndrome and expansion of clinical spectrum

**Authors:** Bianca Mie Sato Kurashima<sup>1</sup>, Laura Machado Lara Carvalho<sup>1</sup>, Rafael Mina Piergiorge<sup>2</sup>, Silvia Souza da Costa<sup>1</sup>, Suely Rodrigues dos Santos<sup>2</sup>, Andressa Pereira Gonçalves<sup>2</sup>, Matheus Augusto Araújo Castro<sup>1</sup>, Francisco Cammarata-Scalisi<sup>3</sup>, Mariana de Carvalho Moreira<sup>4</sup>, Elis Vanessa de Lima Silva<sup>5,6</sup>, Lina Quteinneh<sup>7</sup>, Maria Teresa Carminho-Rodrigues<sup>7,8</sup>, Vincent Michaud<sup>9</sup>, Fanny Morice-Picard<sup>10</sup>, Caroline Rooryck<sup>9</sup>, Matthias Begemann<sup>11</sup>, Larissa Mattern<sup>11</sup>, Cíntia Barros Santos-Rebouças<sup>2#</sup>, Ana Cristina Victorino Krepischi<sup>1#\*</sup>

**Author affiliations:**

<sup>1</sup> Human Genome and Stem Cell Research Center, Department of Genetics and Evolutionary Biology, Institute of Biosciences, University of São Paulo (USP), São Paulo, SP 05508-090, Brazil.

<sup>2</sup> Human Genetics Laboratory (SERVGEN), Department of Genetics, Institute of Biology Roberto Alcântara Gomes, Rio de Janeiro State University (UERJ), Rio de Janeiro, RJ 20550-013, Brazil.

<sup>3</sup> Servicio de Pediatría, Hospital Regional de Antofagasta, Antofagasta 1240000, Chile.

<sup>4</sup> Instituto Jô Clemente (IJC), São Paulo, SP 04040-033, Brazil.

<sup>5</sup> Hospital Infantil Dr. Juvêncio Mattos, São Luís, MA 65065-545, Brazil.

<sup>6</sup> Hospital Universitário da Universidade Federal do Maranhão, São Luís, MA 65020-070, Brazil.

<sup>7</sup> Division of Genetic Medicine, Geneva University Hospitals, Geneva 1205, Switzerland.

<sup>8</sup> Department of Genetics, University of Geneva, Geneva, Switzerland.

<sup>9</sup> Université de Bordeaux, Maladies Rares : Génétique et Métabolisme (MRGM), Institut National de la Santé et de la Recherche Médicale (INSERM) U1211, Centre Hospitalier Universitaire (CHU) de Bordeaux, Service de Génétique Médicale, Bordeaux F-33000, France.

<sup>10</sup> Reference Centre for Rare Genetic Skin Diseases, Paediatric Dermatology Unit, Department of Dermatology, CHU de Bordeaux – GH Pellegrin, Bordeaux 33075, France.

<sup>11</sup> Center for Human Genetics and Genomic Medicine, Medical Faculty, RWTH Aachen University, Aachen 52074, Germany.

#These authors jointly supervised this work.

**\*Corresponding author:** ana.krepischi@ib.usp.br, University of São Paulo, Institute of Biosciences, Department of Genetics and Evolutionary Biology, Human Genetics Laboratory – LGH, 277 Matão Street – Room 350, São Paulo, SP, Brazil, Postal code: 05508-090.

**Table S1** Summary of published cases of Gabriele-de Vries syndrome (GDVS). The table includes publication of reference, number of novel cases reported, identification of individual patients when more than one case is reported, variant nomenclature, variant type and reported classification of pathogenicity, inheritance pattern, the presence or absence of a clinical description, age of referral or examination and sex of the affected individuals, the presence or absence of neurodevelopmental disorders, movement abnormalities, hormone/thyroid dysfunction and/or autoimmune conditions, and additional observations

| Publication           | Number of novel reported cases of GDVS | Identification (if applicable) and variant      | Variant type | Reported classification | Segregation analysis | Clinical description available | Age at referral or examination | Sex    | Neurodevelopmental disorders (summary)                                                            | Movement abnormalities (summary) | Hormone/thyroid dysfunction and/or autoimmune conditions (summary) | Additional observations                                                            |
|-----------------------|----------------------------------------|-------------------------------------------------|--------------|-------------------------|----------------------|--------------------------------|--------------------------------|--------|---------------------------------------------------------------------------------------------------|----------------------------------|--------------------------------------------------------------------|------------------------------------------------------------------------------------|
| Gabriele et al., 2017 | 10                                     | <b>Individual 1</b><br>c.1138G>T<br>p.Asp380Tyr | missense     | pathogenic              | <i>de novo</i>       | +                              | 2 years, 9 months              | male   | +<br>(global development delay, moderate speech delay, delayed motor development)                 | -                                | NA                                                                 | some neurodevelopmental features cannot be evaluated due to the age of the patient |
|                       |                                        | <b>Individual 2</b><br>c.1097T>C<br>p.Leu366Pro | missense     | pathogenic              | <i>de novo</i>       | +                              | 15 years, 10 months            | male   | +<br>(moderate intellectual disability, first words at 2 years, delayed motor development)        | +<br>(toe walking)               | NA                                                                 |                                                                                    |
|                       |                                        | <b>Individual 3</b><br>c.1096C>G<br>p.Leu366Val | missense     | pathogenic              | <i>de novo</i>       | +                              | 5 years, 1 month               | female | +<br>(mild intellectual disability, mildly delayed speech development, delayed motor development) | -                                | NA                                                                 |                                                                                    |
|                       |                                        | <b>Individual 4</b><br>c.1030C>T<br>p.Gln344*   | nonsense     | pathogenic              | <i>de novo</i>       | +                              | 39 years                       | female | +<br>(mild intellectual disability, mildly delayed speech development, delayed motor development) | +<br>(tremor)                    | NA                                                                 |                                                                                    |

**Table S1** (continued)

| Publication                          | Number of novel reported cases of GDVS | Identification (if applicable) and variant            | Variant type | Reported classification | Segregation analysis | Clinical description available | Age at referral or examination | Sex    | Neurodevelopmental disorders (summary)                                                                       | Movement abnormalities (summary)                                     | Hormone/thyroid dysfunction and/or autoimmune conditions (summary) | Additional observations                                                            |
|--------------------------------------|----------------------------------------|-------------------------------------------------------|--------------|-------------------------|----------------------|--------------------------------|--------------------------------|--------|--------------------------------------------------------------------------------------------------------------|----------------------------------------------------------------------|--------------------------------------------------------------------|------------------------------------------------------------------------------------|
| Gabriele et al., 2017<br>(continued) |                                        | <b>Individual 5</b><br>c.535A>T<br>p.Lys179*          | nonsense     | pathogenic              | <i>de novo</i>       | +                              | 17 years,<br>6 months          | female | +<br>(mild intellectual disability, learning difficulties, moderate speech delay, delayed motor development) | +<br>(progressive dystonia)                                          | +<br>(hypothyroidism)                                              |                                                                                    |
|                                      |                                        | <b>Individual 6</b><br>c.1173delT<br>p.Asn391Lysfs*10 | frameshift   | pathogenic              | <i>de novo</i>       | +                              | 7 years,<br>10 months          | male   | +<br>(mild to moderate intellectual disability, speech delay, mildly delayed motor development)              | +<br>(waddling gait)                                                 | NA                                                                 |                                                                                    |
|                                      |                                        | <b>Individual 7</b><br>c.1174_1176del<br>p.Lys393del  | missense     | pathogenic              | <i>de novo</i>       | +                              | 1 year,<br>3 months            | male   | +<br>(mild global development delay)                                                                         | -                                                                    | NA                                                                 | some neurodevelopmental features cannot be evaluated due to the age of the patient |
|                                      |                                        | <b>Individual 8</b><br>c.385delG<br>p.Asp129Ilefs*127 | frameshift   | pathogenic              | <i>de novo</i>       | +                              | 35 years                       | female | +<br>(mild global developmental delay, delayed speech development, delayed motor development)                | +<br>(progressive dystonia, progressive gait impairment, dysarthria) | +<br>(hypothyroidism)                                              | individual 8 was also later described by Ferng et al. (2022)                       |
|                                      |                                        | <b>Individual 9</b><br>c.1015A>C<br>p.Lys339Gln       | missense     | pathogenic              | <i>de novo</i>       | +                              | 9 years,<br>3 months           | male   | +<br>(moderate to severe intellectual disability, non-verbal, delayed motor development)                     | -                                                                    | +<br>(growth hormone deficiency)                                   |                                                                                    |

**Table S1** (continued)

| Publication                       | Number of novel reported cases of GDVS | Identification (if applicable) and variant      | Variant type | Reported classification | Segregation analysis | Clinical description available | Age at referral or examination | Sex    | Neurodevelopmental disorders (summary)                              | Movement abnormalities (summary)                                                                                                                                                             | Hormone/thyroid dysfunction and/or autoimmune conditions (summary) | Additional observations                                                                      |
|-----------------------------------|----------------------------------------|-------------------------------------------------|--------------|-------------------------|----------------------|--------------------------------|--------------------------------|--------|---------------------------------------------------------------------|----------------------------------------------------------------------------------------------------------------------------------------------------------------------------------------------|--------------------------------------------------------------------|----------------------------------------------------------------------------------------------|
| Gabriele et al., 2017 (continued) |                                        | <b>Individual 10</b><br>c.958C>T<br>p.His320Tyr | missense     | pathogenic              | <i>de novo</i>       | +                              | 1 year, 5 months               | female | +<br>(delayed motor development)                                    | -                                                                                                                                                                                            | NA                                                                 | some neurodevelopmental features cannot be evaluated due to the age of the patient           |
| Morales-Rosado et al., 2018       | 1                                      | c.860_864delTTAAAA<br>p.Ile287Arg fs*3          | frameshift   | presumed pathogenic     | <i>de novo</i>       | +                              | 25 years                       | female | +<br>(delayed motor development, learning disability)               | +<br>(wide-based, waddling, somewhat antalgic gait)                                                                                                                                          | +<br>(autoimmune myasthenia gravis)                                |                                                                                              |
| Carminho-Rodrigues et al., 2020   | 1                                      | (NM: 003403.4)<br>c.907T>C<br>p.Cys303Arg       | missense     | pathogenic              | <i>de novo</i>       | +                              | 21 years                       | female | +<br>(mild intellectual deficit)                                    | +<br>(complex movement disorder including an action tremor, cerebellar ataxia, dystonia, and partial ocular apraxia as the most striking feature)                                            | -                                                                  | this patient was included in the present study (P9)                                          |
| Bae et al., 2021                  | 1                                      | c.1220A>G<br>p.His407Arg                        | missense     | likely pathogenic       | <i>de novo</i>       | +                              | 7 months                       | female | +<br>(mild developmental delay)                                     | NA                                                                                                                                                                                           | -                                                                  | some motor and neurodevelopmental features cannot be evaluated due to the age of the patient |
| Balakrishnan & Ranganath, 2021    | 1                                      | (NM_003403)<br>c.690del<br>p.Asp231IlefsTer25   | frameshift   | pathogenic              | NA                   | +                              | 11 years                       | female | +<br>(moderate intellectual disability, global developmental delay) | +<br>(altered gait with recurrent falls, owing to right-sided curvature of the spine and associated dystonia, twisting movements of lower limbs and hip joints, abnormal posturing of hands) | NA                                                                 |                                                                                              |

**Table S1** (continued)

| Publication            | Number of novel reported cases of GDVS | Identification (if applicable) and variant                     | Variant type | Reported classification | Segregation analysis | Clinical description available | Age at referral or examination | Sex    | Neurodevelopmental disorders (summary)                                                                  | Movement abnormalities (summary)                                                                                                          | Hormone/thyroid dysfunction and/or autoimmune conditions (summary) | Additional observations                                                                                         |
|------------------------|----------------------------------------|----------------------------------------------------------------|--------------|-------------------------|----------------------|--------------------------------|--------------------------------|--------|---------------------------------------------------------------------------------------------------------|-------------------------------------------------------------------------------------------------------------------------------------------|--------------------------------------------------------------------|-----------------------------------------------------------------------------------------------------------------|
| Zorzi et al., 2021     | 1                                      | (NM_003403)<br>c.1118_1119delAT<br>p.His373Argfs*18            | frameshift   | pathogenic              | <i>de novo</i>       | +                              | 32 years                       | male   | +<br>(moderate intellectual disability, slight delay of psychomotor development, learning difficulties) | +<br>(severe generalized dystonia with continuous dystonic movements, prominent trunk involvement, and abduction-type laryngeal dystonia) | NA                                                                 |                                                                                                                 |
| Tan et al., 2021       | 1                                      | (NM_003403.5)<br>c.1124G>A<br>p.Arg375Gln                      | missense     | likely pathogenic       | <i>de novo</i>       | +                              | 9 months                       | female | +<br>(developmental delay)                                                                              | NA                                                                                                                                        | -                                                                  | some motor and neurodevelopmental features cannot be evaluated due to the age of the patient                    |
| Malaquias et al., 2021 | 1                                      | (NM_003403.4)<br>c.1099dup<br>p.Asp367Glyfs*25                 | frameshift   | pathogenic              | <i>de novo</i>       | +                              | 38 years                       | female | -                                                                                                       | +<br>(writer's clamp, generalized dystonia, with severe oromandibular involvement)                                                        | -                                                                  |                                                                                                                 |
| Imafidon et al., 2021  | 1                                      | <b>ID 659</b><br>c.568_581del<br>p.Ala190Argfs*34              | frameshift   | pathogenic              | <i>de novo</i>       | +<br>(not much detailed)       | NA                             | male   | NA                                                                                                      | NA                                                                                                                                        | NA                                                                 | it is a large study that does not provide a detailed description of each case                                   |
| Zech et al., 2021      | 1                                      | <b>Patient 39</b><br>(NM_003403.4)<br>c.1118A>G<br>p.His373Arg | missense     | NA                      | NA                   | -                              | NA                             | NA     | NA                                                                                                      | +<br>(dystonia)                                                                                                                           | NA                                                                 | it is a large study of a cohort of individuals with dystonia, with no detailed general description of each case |

**Table S1** (continued)

| Publication            | Number of novel reported cases of GDVS | Identification (if applicable) and variant                   | Variant type | Reported classification | Segregation analysis | Clinical description available | Age at referral or examination | Sex    | Neurodevelopmental disorders (summary)                                                                                             | Movement abnormalities (summary)                                                                                                   | Hormone/thyroid dysfunction and/or autoimmune conditions (summary) | Additional observations                                                                                  |
|------------------------|----------------------------------------|--------------------------------------------------------------|--------------|-------------------------|----------------------|--------------------------------|--------------------------------|--------|------------------------------------------------------------------------------------------------------------------------------------|------------------------------------------------------------------------------------------------------------------------------------|--------------------------------------------------------------------|----------------------------------------------------------------------------------------------------------|
| Ferng et al., 2022     | 1                                      | <b>Case 1</b><br>c.908G>T<br>p.Cys303Phe                     | missense     | NA                      | NA                   | +                              | 22 years                       | female | +<br>(mild global developmental delay, autism)                                                                                     | +<br>(generalized dystonia involving feet, hands, torso, tongue, jaw, pharynx, and larynx, worsening dysarthria, gait abnormality) | NA                                                                 | the other case described in the article (Case 2) had been previously published by Gabriele et al. (2017) |
| Khamirani et al., 2022 | 1                                      | (NM_003403)<br>c.690delA<br>p.Glu231Ilefs*25                 | frameshift   | pathogenic              | <i>de novo</i>       | +                              | 10 years                       | male   | +<br>(developmental delay, motor delay, moderate hypotonia, cerebral atrophy, severe learning disability, autistic behavior, ADHD) | +<br>(gait abnormality, ataxia, ocular movement disorder)                                                                          | NA                                                                 |                                                                                                          |
| Cherik et al., 2022    | 12                                     | <b>YY1-1</b><br>(NM_003403.4)<br>c.1007A>G<br>p.Glu336Gly    | missense     | NA                      | <i>de novo</i>       | +                              | 18 years, 2 months             | female | +<br>(motor developmental delay, intellectual disability)                                                                          | -                                                                                                                                  | -                                                                  |                                                                                                          |
|                        |                                        | <b>YY1-2</b><br>(NM_003403.3)<br>c.1112G>A<br>p.Arg371His    | missense     | NA                      | <i>de novo</i>       | +                              | 16 years, 7 months             | female | +<br>(motor developmental delay, intellectual disability)                                                                          | -                                                                                                                                  | -                                                                  |                                                                                                          |
|                        |                                        | <b>YY1-3</b><br>YY1arr[GRCh37]14q32.2(100402364-101351127)x1 | CNV deletion | NA                      | <i>de novo</i>       | +                              | 31 years, 9 months             | male   | +<br>(motor developmental delay, intellectual disability)                                                                          | +<br>(severe dystonia, spasticity)                                                                                                 | -                                                                  |                                                                                                          |

**Table S1** (continued)

| Publication                        | Number of novel reported cases of GDVS | Identification (if applicable) and variant                         | Variant type | Reported classification | Segregation analysis | Clinical description available | Age at referral or examination | Sex    | Neurodevelopmental disorders (summary)                                                  | Movement abnormalities (summary)                       | Hormone/thyroid dysfunction and/or autoimmune conditions (summary) | Additional observations                                                            |
|------------------------------------|----------------------------------------|--------------------------------------------------------------------|--------------|-------------------------|----------------------|--------------------------------|--------------------------------|--------|-----------------------------------------------------------------------------------------|--------------------------------------------------------|--------------------------------------------------------------------|------------------------------------------------------------------------------------|
| Cherik et al., 2022<br>(continued) |                                        | <b>YY1-4</b><br>(NM_003403.4)<br>c.1001T>C<br>p.Phe334Ser          | missense     | NA                      | <i>de novo</i>       | +                              | 6 years                        | female | +<br>(motor developmental delay, intellectual disability)                               | +<br>(dystonia)                                        | -                                                                  |                                                                                    |
|                                    |                                        | <b>YY1-5</b><br>(NM_003403.4)<br>c.1151_1154dup<br>p.Pro386Valfs*7 | frameshift   | NA                      | <i>de novo</i>       | +                              | 6 years, 2 months              | female | +<br>(motor developmental delay, intellectual disability)                               | -                                                      | NA                                                                 |                                                                                    |
|                                    |                                        | <b>YY1-7</b><br>(NM_003403.5)<br>c.1067C>T<br>p.Thr356Met          | missense     | NA                      | paternal             | +                              | 5 years, 9 months              | male   | +<br>(motor developmental delay, intellectual disability)                               | -                                                      | -                                                                  |                                                                                    |
|                                    |                                        | <b>YY1-8</b><br>c.1121T>G<br>p.Val374Gly                           | missense     | NA                      | <i>de novo</i>       | +                              | 4 years, 9 months              | male   | +<br>(motor developmental delay)                                                        | -                                                      | -                                                                  | some neurodevelopmental features cannot be evaluated due to the age of the patient |
|                                    |                                        | <b>YY1-9</b><br>YY1:c.959A>G<br>p.His320Arg                        | missense     | NA                      | ??                   | +                              | 2 years, 1 months              | male   | +<br>(motor developmental delay, global developmental delay)                            | -                                                      | NA                                                                 | some neurodevelopmental features cannot be evaluated due to the age of the patient |
|                                    |                                        | <b>YY1-11</b><br>(NM_003403.5)<br>c.690dup<br>p.Asn231Argfs*3      | frameshift   | NA                      | <i>de novo</i>       | +                              | 8 years, 1 months              | male   | +<br>(motor developmental delay, learning difficulties, facial tics, Tourette syndrome) | +<br>(gait imbalance, exercise-induced muscle fatigue) | -                                                                  |                                                                                    |

**Table S1** (continued)

| Publication                        | Number of novel reported cases of GDVS | Identification (if applicable) and variant          | Variant type | Reported classification | Segregation analysis | Clinical description available | Age at referral or examination | Sex    | Neurodevelopmental disorders (summary)                     | Movement abnormalities (summary) | Hormone/thyroid dysfunction and/or autoimmune conditions (summary) | Additional observations                                                                                                                                                      |
|------------------------------------|----------------------------------------|-----------------------------------------------------|--------------|-------------------------|----------------------|--------------------------------|--------------------------------|--------|------------------------------------------------------------|----------------------------------|--------------------------------------------------------------------|------------------------------------------------------------------------------------------------------------------------------------------------------------------------------|
| Cherik et al., 2022<br>(continued) |                                        | YY1-12<br>(NM_003403.5)<br>c.1124G>A<br>p.Arg375Gln | missense     | NA                      | <i>de novo</i>       | +                              | 25 years, 7 months             | male   | +<br>(motor developmental delay, intellectual disability)  | -                                | +<br>(hypothyroidism)                                              |                                                                                                                                                                              |
|                                    |                                        | YY1-13<br>(NM_003403.4)<br>c.908G>T<br>p.Cys303Phe  | missense     | NA                      | <i>de novo</i>       | +                              | 20 years, 6 months             | male   | +<br>(motor developmental delay, intellectual disability)  | +<br>(generalized dystonia)      | +<br>(thyroid nodule)                                              |                                                                                                                                                                              |
|                                    |                                        | YY1-6<br>(NM_003403.5)<br>c.1067C>T<br>p.Thr356Met  | missense     | NA                      | <i>de novo</i>       | -                              | 33 years                       | male   | +<br>(intellectual disability)                             | -                                | -                                                                  |                                                                                                                                                                              |
| dos Santos et al., 2022            | 1                                      | (NM_003403.5)<br>c.1106A>G<br>p.Asn369Ser           | missense     | pathogenic              | <i>de novo</i>       | +                              | 22 years                       | female | +<br>(global developmental delay, intellectual disability) | -                                | -                                                                  | this patient was included in the present study (P10)                                                                                                                         |
| Alali & Vitalone, 2022             | 1                                      | c.769G>T<br>p.Gly257*                               | nonsense     | pathogenic              | <i>de novo</i>       | +                              | 10 years                       | female | +<br>(global developmental delay, ADHD)                    | -                                | +<br>(autoimmune hypothyroidism)                                   |                                                                                                                                                                              |
| Chaves et al., 2023                | 1                                      | (NM_003403.5)<br>c.1062+1G>A<br>NP_003394.1:p.?     | splicing     | pathogenic              | <i>de novo</i>       | +<br>(not much detailed)       | 8 years, 11 months             | female | +<br>(intellectual disability, ADHD, learning disability)  | -                                | +<br>(atopic dermatitis, Hashimoto's thyroiditis)                  | this patient was included in the present study (P11); atopic dermatitis and Hashimoto's thyroiditis were identified upon re-evaluation (not reported in Chaves et al., 2023) |

**Table S1** (continued)

| Publication         | Number of novel reported cases of GDVS | Identification (if applicable) and variant        | Variant type | Reported classification | Segregation analysis | Clinical description available | Age at referral or examination | Sex    | Neurodevelopmental disorders (summary)                                           | Movement abnormalities (summary)                                                                                                                                                | Hormone/thyroid dysfunction and/or autoimmune conditions (summary) | Additional observations                                                                      |
|---------------------|----------------------------------------|---------------------------------------------------|--------------|-------------------------|----------------------|--------------------------------|--------------------------------|--------|----------------------------------------------------------------------------------|---------------------------------------------------------------------------------------------------------------------------------------------------------------------------------|--------------------------------------------------------------------|----------------------------------------------------------------------------------------------|
| Koruga et al., 2023 | 1                                      | c.1A>C<br>p.Met1?                                 | start loss   | likely pathogenic       | <i>de novo</i>       | +                              | NA                             | male   | +<br>(mildly delayed motor and speech development, slow psychomotor development) | -                                                                                                                                                                               | NA                                                                 |                                                                                              |
| Woo; Kim; Kim, 2023 | 1                                      | c.1130A>G<br>p.His377Arg                          | missense     | pathogenic              | <i>de novo</i>       | +                              | 4 years                        | female | +<br>(global developmental delay, cognitive impairment, autistic features)       | -                                                                                                                                                                               | NA                                                                 | some neurodevelopmental features cannot be evaluated due to the age of the patient           |
| Chawla et al., 2023 | 1                                      | c.625C>T<br>p.Gln209Ter                           | nonsense     | likely pathogenic       | NA                   | +                              | 12 years                       | female | -                                                                                | +<br>(writer's cramp and myoclonic jerks at 9 years, evolving to action induced dystonia in the right upper limb, followed by similar movements in the left upper limb as well) | NA                                                                 |                                                                                              |
| Asato et al., 2023  | 1                                      | c.1043C>T<br>p.Thr348Ile                          | missense     | likely pathogenic       | <i>de novo</i>       | +                              | 8 months                       | male   | +<br>(gross motor delay)                                                         | NA                                                                                                                                                                              | +<br>(hypothyroidism)                                              | some motor and neurodevelopmental features cannot be evaluated due to the age of the patient |
| Yang et al., 2024   | 1                                      | (NM_003403.5)<br>c.458_476del<br>p.Val153Alafs*97 | frameshift   | pathogenic              | NA                   | +                              | 1 year, 10 months              | female | +<br>(motor developmental delay, delayed language development)                   | -                                                                                                                                                                               | -                                                                  | some neurodevelopmental features cannot be evaluated due to the age of the patient           |

**Table S1** (continued)

| Publication           | Number of novel reported cases of GDVS | Identification (if applicable) and variant                          | Variant type      | Reported classification | Segregation analysis                                               | Clinical description available | Age at referral or examination | Sex    | Neurodevelopmental disorders (summary)                | Movement abnormalities (summary)                                     | Hormone/thyroid dysfunction and/or autoimmune conditions (summary) | Additional observations                                                                                                 |
|-----------------------|----------------------------------------|---------------------------------------------------------------------|-------------------|-------------------------|--------------------------------------------------------------------|--------------------------------|--------------------------------|--------|-------------------------------------------------------|----------------------------------------------------------------------|--------------------------------------------------------------------|-------------------------------------------------------------------------------------------------------------------------|
| Srouf et al., 2024    | 1                                      | (NM_003403.4)<br>c.1024C>T<br>p.Arg342*                             | stop gain         | VUS                     | NA                                                                 | +                              | 1 year, 4 months               | male   | +<br>(delayed developmental milestones, speech delay) | +<br>(lack of coordination, ataxic gait)                             | NA                                                                 | some neurodevelopmental features cannot be evaluated due to the age of the patient                                      |
| Shin et al., 2024     | 1                                      | (NM_003403.5)<br>c.843-1_863del                                     | splice site       | likely pathogenic       | NA                                                                 | +                              | 28 years                       | male   | -                                                     | +<br>(limb dystonia, gait disturbance, infantile nystagmus, tremors) | -                                                                  |                                                                                                                         |
| Topa et al., 2024     | 1                                      | <b>P2605_115(M)</b><br>c.1057T>C<br>p.Phe353Leu                     | missense          | likely pathogenic       | expected <i>de novo</i> (absent in the mother, father unavailable) | -                              | NA                             | male   | NA                                                    | NA                                                                   | NA                                                                 | it is a large study of a cohort of individuals with craniosynostosis, with no detailed general description of each case |
| Luo et al., 2024      | 1                                      | <b>NG21-81</b><br>(NM_003403.4)<br>c.682delG<br>p.Glu228LysfsTer 28 | frameshift        | likely pathogenic       | <i>de novo</i>                                                     | -                              | gestational week: 24           | NA     | NA                                                    | NA                                                                   | NA                                                                 | it is a large study of a cohort of foetuses with central nervous system abnormalities                                   |
| Mudassir et al., 2025 | 1                                      | <b>ES-10</b><br>(NM_003403.5)<br>c.141_143delGGA<br>p.Glu47del      | in-frame deletion | pathogenic              | <i>de novo</i>                                                     | +                              | 7 years, 8 months              | male   | +<br>(IQ < 25)                                        | +<br>(movement disorder including ataxia and seizures)               | NA                                                                 |                                                                                                                         |
| Pal et al., 2025      | 1                                      | (NM_003403.5)<br>c.1025G>A<br>p.Arg342Gln                           | missense          | pathogenic              | <i>de novo</i>                                                     | +                              | 21 years                       | female | +<br>(global developmental delay)                     | -                                                                    | +<br>(autoimmune hypothyroidism)                                   |                                                                                                                         |

**Table S1** (continued)

| Publication        | Number of novel reported cases of GDVS | Identification (if applicable) and variant | Variant type | Reported classification | Segregation analysis | Clinical description available | Age at referral or examination | Sex    | Neurodevelopmental disorders (summary) | Movement abnormalities (summary) | Hormone/thyroid dysfunction and/or autoimmune conditions (summary) | Additional observations |
|--------------------|----------------------------------------|--------------------------------------------|--------------|-------------------------|----------------------|--------------------------------|--------------------------------|--------|----------------------------------------|----------------------------------|--------------------------------------------------------------------|-------------------------|
| Huang et al., 2025 | 1                                      | c.385del<br>p.Asp129Ilefs*127              | frameshift   | pathogenic              | <i>de novo</i>       | +                              | 9 years, 5 months              | female | +<br>(mild intellectual disability)    | -                                | +<br>(Hashimoto's thyroiditis)                                     |                         |

Abbreviations: +: present; -: absent; ADHD: Attention Deficit Hyperactivity Disorder; IQ: intelligence quotient; NA: information not available

**Table S2** Summary of the clinical traits of the eleven patients with heterozygous pathogenic/likely pathogenic variants in *YY1* (three of them previously reported) who were evaluated in this study

|                                                        | Patient 1                      | Patient 2                      | Patient 3                  | Patient 4<br>(mother of Patient 5) | Patient 5                                                  | Patient 6 | Patient 7                                                                        | Patient 8                  | Patient 9 | Patient 10            | Patient 11                        |
|--------------------------------------------------------|--------------------------------|--------------------------------|----------------------------|------------------------------------|------------------------------------------------------------|-----------|----------------------------------------------------------------------------------|----------------------------|-----------|-----------------------|-----------------------------------|
| <b>Global developmental delay</b>                      | +                              | +                              | +                          | +                                  | +<br>Neonatal axial hypotonia (premature birth at 30+3 WG) | +         | Delayed motor and socio-emotional development, speech development is not delayed | +                          | +         | +                     | -                                 |
| <b>Intellectual disability</b>                         | not applicable (< 5 years old) | not applicable (< 5 years old) | +(mild)                    | +(mild)                            | NA (too young)                                             | +         | +(IQ 82)                                                                         | +                          | +         | +(moderate to severe) | +(mild)                           |
| <b>Delayed speech and language development</b>         | +                              | +                              | +                          | +                                  | +                                                          | +         | -                                                                                | NA (parents do not recall) | +         | +                     | +                                 |
| <b>Attention Deficit Hyperactivity Disorder (ADHD)</b> | +                              | -                              | +                          | -                                  | NA (too young)                                             | +         | +(Attention Deficit Disorder)                                                    | NA                         | +         | NA                    | +                                 |
| <b>Autism Spectrum Disorder (ASD)</b>                  | +(nonverbal)                   | under investigation            | -                          | -                                  | NA (too young)                                             | -         | -                                                                                | NA                         | -         | +                     | +(diagnosed at 18 years of age)   |
| <b>Anxiety</b>                                         | NA                             | -                              | +                          | -                                  | NA (too young)                                             | -         | -                                                                                | NA                         | +         | +                     | -                                 |
| <b>Self-injurious behavior</b>                         | +                              | -                              | -                          | -                                  | NA (too young)                                             | -         | -                                                                                | NA                         | -         | +                     | +(trichotillomania)               |
| <b>Sleep disturbance</b>                               | +                              | +                              | -                          | -                                  | -                                                          | -         | -                                                                                | NA                         | -         | -                     | +(insomnia (screen))              |
| <b>Ataxia/unsteady gait</b>                            | +                              | +                              | +                          | -(dizziness)                       | NA (too young)                                             | +         | -                                                                                | NA                         | +         | wheelchair            | -                                 |
| <b>Corpus callosum malformations</b>                   | +(thin corpus callosum)        | -                              | NA                         | -                                  | -                                                          | -         | NA MRI not performed                                                             | NA                         | -         | -                     | -                                 |
| <b>Hydrocephalus</b>                                   | NA                             | +(modest)                      | NA                         | -                                  | -                                                          | -         | -                                                                                | NA                         | -         | -                     | -                                 |
| <b>Impairment of visual pursuit</b>                    | +                              | NA                             | -                          | -                                  | -(retinopathy due to prematurity)                          | -         | -                                                                                | NA                         | +         | -                     | -                                 |
| <b>Strabismus</b>                                      | +(convergent)                  | -                              | -                          | +(left eye)                        | +                                                          | -         | -                                                                                | -                          | +         | +                     | +(surgery at the age of 10 years) |
| <b>Hearing impairment</b>                              | +(bilateral neurosensory)      | NA                             | -                          | -                                  | -                                                          | -         | -                                                                                | NA                         | -         | +(mild)               | -                                 |
| <b>Dysarthria</b>                                      | -(no speech)                   | +                              | NA                         | -                                  | NA (too young)                                             | +         | -                                                                                | NA                         | +         | -(no speech)          | -                                 |
| <b>Thyroid dysfunction</b>                             | -                              | -                              | +(Hashimoto's thyroiditis) | -                                  | -                                                          | -         | +(Graves' Disease)                                                               | +(hyperthyroidism)         | -         | -                     | +(Hashimoto's thyroiditis)        |

Table S2 (continued)

|                                | Patient 1                                | Patient 2 | Patient 3                               | Patient 4<br>(mother of Patient 5) | Patient 5                             | Patient 6 (France)                       | Patient 7                                                                                                                                      | Patient 8                                                     | Patient 9    | Patient 10                                         | Patient 11                     |
|--------------------------------|------------------------------------------|-----------|-----------------------------------------|------------------------------------|---------------------------------------|------------------------------------------|------------------------------------------------------------------------------------------------------------------------------------------------|---------------------------------------------------------------|--------------|----------------------------------------------------|--------------------------------|
| Feeding difficulties           | +                                        | -         | -                                       | -                                  | -                                     | +                                        | +<br>(dystrophy due to severe feeding difficulties with swallowing difficulties and recurrent vomiting, inefficient motility of the esophagus) | +                                                             | -            | +                                                  | -                              |
| Gastroesophageal reflux        | +                                        | -         | -                                       | -                                  | -                                     | +                                        | +                                                                                                                                              | +                                                             | -            | + (as a baby)<br>(abdominal migraine and vomiting) | -                              |
| Constipation                   | +                                        | -         | -                                       | -                                  | -                                     | +                                        | -                                                                                                                                              | +                                                             | -            | +                                                  | +                              |
| Recurrent infections           | +                                        | -         | +                                       | -                                  | NA<br>(too young)                     | -                                        | +                                                                                                                                              | +<br>(Upper Respiratory Infections and acute gastroenteritis) | -            | +                                                  | sinus infection<br>(3-8 years) |
| Craniofacial asymmetry         | +                                        | NA        | NA                                      | -                                  | -<br>(brachycephaly)                  | +                                        | +                                                                                                                                              | +                                                             | +            | -<br>(microcephaly long face)                      | -                              |
| Large/prominent forehead       | +                                        | +         | +                                       | +                                  | +                                     | +                                        | -                                                                                                                                              | +                                                             | +            | +                                                  | -                              |
| Malar flattening               | +                                        | NA        | NA                                      | -                                  | -                                     | +                                        | +                                                                                                                                              | +                                                             | +            | +                                                  | -                              |
| Abnormal ear morphology        | +<br>(low-set, posteriorly rotated ears) | NA        | +<br>(simple ears and overfolded helix) | -                                  | +<br>(low set ears, overfolded helix) | +<br>(low-set, posteriorly rotated ears) | +<br>(protruding ears)                                                                                                                         | -                                                             | +            | +                                                  | +<br>(R preauricular pit)      |
| Periorbital fullness           | +                                        | +         | +                                       | +                                  | +                                     | -                                        | +                                                                                                                                              | +                                                             | +            | +                                                  | +                              |
| Downslanted palpebral fissures | +                                        | +         | +                                       | -                                  | -                                     | +                                        | -                                                                                                                                              | +                                                             | +            | +                                                  | -                              |
| Eyelid ptosis                  | +                                        | +         | +<br>(bilateral)                        | -                                  | -                                     | -                                        | -                                                                                                                                              | -                                                             | -            | +                                                  | -                              |
| Proptosis                      | +                                        | -         | +                                       | -                                  | -                                     | +                                        | -                                                                                                                                              | +                                                             | -            | -                                                  | -                              |
| Epicanthus                     | -                                        | NA        | +                                       | -                                  | -                                     | -                                        | -                                                                                                                                              | NA                                                            | -            | +                                                  | +                              |
| Telecanthus                    | +                                        | NA        | +                                       | -                                  | -                                     | +                                        | -                                                                                                                                              | NA                                                            | -            | +                                                  | hypertelorism                  |
| Almond-shaped eyes             | +                                        | NA        | NA                                      | +                                  | +                                     | +                                        | +                                                                                                                                              | NA                                                            | +            | -                                                  | +                              |
| Wide, concave nasal bridge     | +                                        | NA        | +                                       | -                                  | -                                     | +                                        | -                                                                                                                                              | NA                                                            | +            | +                                                  | -                              |
| Bulbous nose tip               | +                                        | NA        | +                                       | +                                  | +                                     | +                                        | -                                                                                                                                              | +                                                             | +            | -                                                  | -                              |
| Abnormal columella             | +<br>(short)                             | NA        | NA                                      | +<br>(enlarged columella)          | +<br>(enlarged columella)             | +<br>(short)                             | +<br>(short)                                                                                                                                   | NA                                                            | +<br>(short) | +<br>(short)                                       | -                              |

Table S2 (continued)

|                                                                             | Patient 1                                                    | Patient 2            | Patient 3                           | Patient 4<br>(mother of Patient 5) | Patient 5                              | Patient 6 (France) | Patient 7        | Patient 8     | Patient 9      | Patient 10 | Patient 11 |
|-----------------------------------------------------------------------------|--------------------------------------------------------------|----------------------|-------------------------------------|------------------------------------|----------------------------------------|--------------------|------------------|---------------|----------------|------------|------------|
| <b>Downturned corners of mouth</b>                                          | +                                                            | +                    | NA                                  | -                                  | -                                      | +                  | -                | +             | +              | -          | -          |
| <b>Thick lower lip</b>                                                      | -                                                            | -                    | +                                   | -                                  | -                                      | -                  | -                | +(thick lips) | +              | -          | +          |
| <b>Micrognathia</b>                                                         | +                                                            | +                    | +                                   | -                                  | -                                      | +                  | -                | NA            | -              | -          | +          |
| <b>Pointed chin</b>                                                         | +                                                            | +                    | +                                   | +                                  | +                                      | +                  | -                | -             | +              | +          | -          |
| <b>Sparse hair</b>                                                          | +                                                            | +                    | NA                                  | -                                  | +                                      | +                  | -                | -             | -              | -          | -          |
| <b>Arachnodactyly</b>                                                       | +                                                            | NA                   | +                                   | -                                  | -                                      | -                  | -                | +             | -              | +          | +          |
| <b>Camptodactyly</b>                                                        | -                                                            | NA                   | +                                   | -                                  | -                                      | -                  | -                | NA            | -              | -          | -          |
| <b>Fingers with joints hypermobility</b>                                    | +                                                            | NA                   | +                                   | -                                  | -                                      | +                  | -                | NA            | -              | +          | -          |
| <b>Tapered phalanx of fingers</b>                                           | NA<br>(radiography results not available)                    | NA                   | +                                   | -                                  | -                                      | -                  | -                | NA            | -              | -          | NA         |
| <b>Marfanoid habitus</b>                                                    | +                                                            | NA                   | +                                   | -                                  | -                                      | +                  | -                | NA            | +              | +          | +          |
| <b>Big hands and feet</b>                                                   | +                                                            | -                    | +                                   | -                                  | -                                      | -                  | -                | +             | -              | +(hands)   | -          |
| <b>Pregnancy complications (other than intrauterine growth restriction)</b> | -<br>(prenatal diagnosis of intrauterine growth restriction) | +(maternal diabetes) | +(maternal hypertension)            | +(maternal hypertension)           | +(twin pregnancy, preeclampsia)        | -                  | -                | (anemia)      | -              | -          | -          |
| <b>Intrauterine growth restriction</b>                                      | +                                                            | +                    | +                                   | NA                                 | +(twin bichorial biamniotic pregnancy) | +                  | -                | NA            | -              | +          | -          |
| <b>Premature birth</b>                                                      | +                                                            | -                    | +                                   | +                                  | +                                      | +                  | -                | -             | -              | -          | -          |
| <b>Low birth weight</b>                                                     | +                                                            | +                    | +                                   | +                                  | +                                      | +                  | +(3 P., -1.91 z) | +             | +(3rd centile) | -          | -          |
| <b>Neonatal jaundice</b>                                                    | -                                                            | -                    | +(treated with phototherapy)        | NA                                 | +(treated with phototherapy)           | -                  | -                | NA            | -              | +          | -          |
| <b>Congenital torticollis</b>                                               | -                                                            | +                    | -                                   | -                                  | -                                      | -                  | -                | NA            | -              | -          | -          |
| <b>Nasolacrimal duct obstruction</b>                                        | +                                                            | NA                   | +(treated by surgical intervention) | -                                  | -                                      | -                  | -                | NA            | -              | -          | -          |
| <b>Recurrent Moro reflex</b>                                                | +                                                            | +                    | NA                                  | NA                                 | NA                                     | NA                 | -                | NA            | -              | -          | NA         |
| <b>Poor pincer grasp</b>                                                    | +                                                            | +                    | NA                                  | NA                                 | NA                                     | -                  | -                | NA            | +              | +          | NA         |
| <b>Hypotonia</b>                                                            | +(congenital)                                                | +(2-3 years of age)  | +(congenital)                       | NA                                 | +                                      | +(congenital)      | -                | NA            | +              | +          | +          |

**Table S2** (continued)

|                                           | Patient 1                              | Patient 2                              | Patient 3                              | Patient 4<br>(mother of Patient 5)     | Patient 5                                                                                        | Patient 6 (France)                     | Patient 7                                | Patient 8                              | Patient 9                                                        | Patient 10                                            | Patient 11                                        |
|-------------------------------------------|----------------------------------------|----------------------------------------|----------------------------------------|----------------------------------------|--------------------------------------------------------------------------------------------------|----------------------------------------|------------------------------------------|----------------------------------------|------------------------------------------------------------------|-------------------------------------------------------|---------------------------------------------------|
| <b>Decreased body weight</b>              | +                                      | -                                      | -                                      | -                                      | +<br>(-4 SD)                                                                                     | +                                      | +<br>(-3.07 z)                           | +                                      | +                                                                | +                                                     | +                                                 |
| <b>Short stature</b>                      | -                                      | -                                      | +                                      | +                                      | +<br>(-4 SD)                                                                                     | -                                      | -                                        | -                                      | -                                                                | +                                                     | -                                                 |
| <b>Atopic dermatitis</b>                  | +                                      | NA                                     | -                                      | -                                      | NA                                                                                               | -                                      | -                                        | NA                                     | -                                                                | -                                                     | +                                                 |
| <b>Hypertrichosis</b>                     | +                                      | NA                                     | NA                                     | -                                      | -                                                                                                | -                                      | -                                        | NA                                     | -                                                                | -                                                     | -                                                 |
| <b>Sinus tachycardia</b>                  | -                                      | -                                      | -                                      | -                                      | -                                                                                                | -                                      | -                                        | +                                      | -                                                                | -                                                     | -                                                 |
| <b>Left anteroseptal fascicular block</b> | -                                      | -                                      | -                                      | -                                      | -                                                                                                | -                                      | -                                        | +                                      | -                                                                | -                                                     | -                                                 |
| <b>Tricuspid regurgitation</b>            | -                                      | -                                      | -                                      | -                                      | -                                                                                                | -                                      | -                                        | +                                      | -                                                                | -                                                     | -                                                 |
| <b>Other</b>                              |                                        |                                        |                                        | obesity                                | bilateral single palmar crease, smooth and prominent philtrum, thin upper lip, faded cupid's bow |                                        | IgA deficiency, orientation difficulties | fingers with verrucous lesions         |                                                                  | severe scoliosis and chorioretinitis                  | scoliosis (10 years)                              |
| <b>Reference</b>                          | newly identified<br>( <i>de novo</i> ) | newly identified<br>(inherited from affected parent)                                             | newly identified<br>( <i>de novo</i> ) | newly identified<br>( <i>de novo</i> )   | newly identified<br>( <i>de novo</i> ) | Carminho-Rodrigues<br><i>et al.</i> , 2020<br>( <i>de novo</i> ) | dos Santos <i>et al.</i> , 2022<br>( <i>de novo</i> ) | Chaves <i>et al.</i> , 2023<br>( <i>de novo</i> ) |

+: present; -: absent; NA: information not available; WG: weeks of gestation; MRI: magnetic resonance imaging; IQ: intelligence quotient; SD: standard deviation; P: percentile; z: z-score

## References

- Alali A, Vitalone K (2022) eP209: Considering genetic disorders in premature individuals: *YY1*-related disorder in child born at 27 weeks gestation. *Genet Med* 24:S131. <https://doi.org/10.1016/j.gim.2022.01.245>
- Asato MT, Lehman A, Pappas K, Wilhelm A (2023) P330: Gabriele-de Vries syndrome: Exploring the phenotype of a recently described genetic disorder. *Genet Med Open* 1:100358. <https://doi.org/10.1016/j.gimo.2023.100358>
- Bae S, Yang A, Ahn J-H, Kim J, Park H K (2021) Identification of a likely pathogenic variant of *YY1* in a patient with developmental delay. *J Genet Med* 18:60–63. <https://doi.org/10.5734/jgm.2021.18.1.60>
- Balakrishnan S, Ranganath P (2021) Report of an unusual association of hydrosyringomyelia with Gabriele-de Vries syndrome in an Asian-Indian patient. *Clin Dysmorphol* 30:204–206. <https://doi.org/10.1097/MCD.0000000000000385>
- Carminho-Rodrigues MT, Steel D, Sousa SB, Brandt G, Guipponi M, Laurent S, Fokstuen S, Moren A, Zacharia A, Dirren E et al (2020) Complex movement disorder in a patient with heterozygous *YY1* mutation (Gabriele-de Vries syndrome). *Am J Med Genet A* 182:2129–2132. <https://doi.org/10.1002/ajmg.a.61731>
- Chaves LD, Carvalho LML, Tolezano GC, Pires SF, Costa SS, de Scliar MO, Giuliani LR, Bertola DR, Santos-Rebouças CB, Seo GH et al (2023) Skewed X-chromosome Inactivation in Women with Idiopathic Intellectual Disability is Indicative of Pathogenic Variants. *Mol Neurobiol* 60:3758–3769. <https://doi.org/10.1007/s12035-023-03311-0>
- Chawla T, Kumar NK, Goyal V (2023) Heterozygous *YY1* mutation - A mimicker of SGCE-myoclonus-dystonia. *Parkinsonism Relat Disord* 117:105846. <https://doi.org/10.1016/j.parkreldis.2023.105846>
- Cherik F, Reilly J, Kerkhof J, Levy M, McConkey H, Barat-Houari M, Butler KM, Coubes C, Lee JA, Le Guyader G et al (2022) DNA methylation episcapature in Gabriele-de Vries syndrome. *Genet Med* 24:905–914. <https://doi.org/10.1016/j.gim.2021.12.003>
- dos Santos SR, Piergiorgio RM, Rocha J, Abdala BB, Gonçalves AP, Pimentel MMG, Santos-Rebouças CB (2022) A de novo *YY1* missense variant expanding the Gabriele-de Vries syndrome phenotype and affecting X-chromosome inactivation. *Metab Brain Dis* 37:2431–2440. <https://doi.org/10.1007/s11011-022-01024-2>
- Ferng A, Thulin P, Walsh E, Weissbrod PA, Friedman J (2022) *YY1*: A New Gene for Childhood Onset Dystonia with Prominent Oromandibular-Laryngeal Involvement?. *Mov Disord* 37:227–228. <https://doi.org/10.1002/mds.28813>
- Gabriele M, Vulto-van Silfhout AT, Germain PL, Vitriolo A, Kumar R, Douglas E, Haan E, Kosaki K, Takenouchi T, Rauch A et al (2017) *YY1* Haploinsufficiency Causes an Intellectual Disability Syndrome

Featuring Transcriptional and Chromatin Dysfunction. *Am J Hum Genet* 100:907–925. <https://doi.org/10.1016/j.ajhg.2017.05.006>

Huang H, Zhang D, Yang Y, Yang L, Chai Y (2025) Hashimoto's thyroiditis and nanophthalmos in Gabriele-de Vries syndrome: a case report. *Front Endocrinol* 16:1583190–1583190. <https://doi.org/10.3389/fendo.2025.1583190>

Imafidon ME, Sikkema-Raddatz B, Abbott KM, Meems-Veldhuis MT, Swertz MA, van der Velde KJ, Bos DK, Knoers NVAM, Kerstjens-Frederikse WS, van Diemen CC (2021) Strategies in Rapid Genetic Diagnostics of Critically Ill Children: Experiences From a Dutch University Hospital. *Front Pediatr* 9. <https://doi.org/10.3389/fped.2021.600556>

Khamirani HJ, Zoghi S, Namdar ZM, Kamal N, Dianatpour M, Tabei SMB, Mohammadi S, Dehghanian F, Farbod Z, Dastgheib SA (2022) Clinical features of patients with Yin Yang 1 deficiency causing Gabriele-de Vries syndrome: A new case and review of the literature. *Ann Hum Genet* 86:52–62. <https://doi.org/10.1111/ahg.12448>

Koruga N, Pušeljčić S, Babić M, Čuk M, Cvitković Roić A, Vrtarić V, Soldo Koruga A, Rončević A, Tomac V, Rotim T et al (2023) First Reported Case of Gabriele-de Vries Syndrome with Spinal Dysraphism. *Children* 10:623. <https://doi.org/10.3390/children10040623>

Luo C, Wen E, Liu Y, Wang H, Jia B, Chen L, Wu X, Geng Q, Wen H, Li S et al (2024) Application of Whole-Exome Sequencing in the Prenatal Diagnosis of Foetuses With Central Nervous System Abnormalities. *Mol Genet Genomic Med* 12. <https://doi.org/10.1002/mgg3.70016>

Malaquias MJ, Damásio J, Mendes A, Freixo JP, Magalhães M (2021) A Case of *YY1*-Related Isolated Dystonia with Severe Oromandibular Involvement. *Mov Disord* 36:2705–2706. <https://doi.org/10.1002/mds.28771>

Morales-Rosado JA, Kaiwar C, Smith BE, Klee EW, Dhamija R (2018) A case of *YY1*-associated syndromic learning disability or Gabriele-de Vries syndrome with myasthenia gravis. *Am J Med Genet A* 176:2846–2849. <https://doi.org/10.1002/ajmg.a.40626>

Mudassir BU, Mudassir M, Williams JB, Agha Z (2025) *Denovo* variants in *POGZ* and *YY1* genes: The novel mega players for neurodevelopmental syndromes in two unrelated consanguineous families. *PLoS One* 20:e0315597. <https://doi.org/10.1371/journal.pone.0315597>

Pal P, Devireddy S, Bhat S, George JK, Kakkar S, Das Bhowmik A, Tallapaka KB (2025) Case report of a 21-year-old woman with Gabriele-de Vries syndrome and autoimmune hypothyroidism. *Clin Dysmorphol* 34:79–82. <https://doi.org/10.1097/mcd.0000000000000516>

Srouf L, Baroudi K, Saleh A, Shaker R, Mokbel R, Alam CA (2024) The 30<sup>th</sup> Case of Autosomal Dominant Gabriele-de Vries Syndrome: Diagnosis and Management in a 16-Month-Old Lebanese Boy. *Acta Scientific Clinical Case Reports* 5:04-07.

Tan L, Li Y, Liu F, Huang Y, Luo S, Zhao P, Gu W, Lin J, Zhou A, He X (2021) A 9-month-old Chinese patient with Gabriele-de Vries syndrome due to novel germline mutation in the *YY1* gene. *Mol Genet Genomic Med* 9:e1582. <https://doi.org/10.1002/mgg3.1582>

Topa A, Rohlin A, Fehr A, Lovmar L, Stenman G, Tarnow P, Maltese G, Bhatti-Søfteland M, Kölby L (2024) The value of genome-wide analysis in craniosynostosis. *Front Genet* 14:1322462. <https://doi.org/10.3389/fgene.2023.1322462>

Woo H, Kim WS, Kim JS (2023) A rare epilepsy phenotype in Gabriele-de Vries syndrome: A new case and literature review. *Neurol Asia* 28:1063–1067. <https://doi.org/10.54029/2023eat>

Yang J, Yu C, Lyn N, Liu L, Li D, Shang Q (2024) Clinical analysis of Gabriele-de Vries caused by *YY1* mutations and literature review. *Mol Genet Genomic Med* 12:e2281. <https://doi.org/10.1002/mgg3.2281>

Zech M, Jech R, Boesch S, Škorvánek M, Nespál J, Švantnerová J, Wagner M, Sadr-Nabavi A, Distelmaier F, Krenn M. et al (2021) Scoring Algorithm-Based Genomic Testing in Dystonia: A Prospective Validation Study. *Mov Disord* 36:1959–1964. <https://doi.org/10.1002/mds.28614>

Zorzi G, Juan I, Danti FR, Bustos BI, Invernizzi F, Panteghini C, Reale C, Garavaglia B, Chiapparini L, Lubbe SJ et al (2021) *YY1*-Related Dystonia: Clinical Aspects and Long-Term Response to Deep Brain Stimulation. *Mov Disord* 36:1461–1462. <https://doi.org/10.1002/mds.28547>
